# Supplementary material
Source: publisher site journal article supplement (https://www.dovepress.com/article/581901)
Supplement: Supplementary file 1 [file 581901_Supplementary%20Table_1%20%25282%2529.pdf]

**Supplementary Table1.Comparison of baseline characteristics  
between included and excluded patients**

|                         | <b>Exclusion group<br/>(n=2469)</b> | <b>Data missing rate</b> | <b>Inclusion group<br/>(n=1012)</b> | <b>P</b> |
|-------------------------|-------------------------------------|--------------------------|-------------------------------------|----------|
| Male (%)                | 1067 (43.27)                        | 3 (0.12)                 | 415 (41.01)                         | 0.221    |
| Age (years)             | 45.22 ± 13.18                       | 2 (0.08)                 | 43.89 ± 11.85                       | < 0.05   |
| SBP                     | 128.13 ± 22.88                      | 1141 (46.21)             | 125.33±21.01                        | 0.374    |
| DBP                     | 80.09 ± 14.13                       | 1141 (46.21)             | 78.90 ± 13.20                       | 0.84     |
| Hypertension (%)        | 303 (12.27)                         | 0                        | 136 (13.44)                         | 0.346    |
| Diabetes (%)            | 16 (0.65)                           | 0                        | 0 (0)                               | 0.092    |
| Alcohol consumption (%) | 108 (5.86)                          | 0                        | 55 (5.4)                            | 0.618    |
| Smoking (%)             | 229(12.49)                          | 0                        | 112 (11.1)                          | < 0.05   |
| Hb                      | 125.51 ± 19.19                      | 4(0.16)                  | 127.57 ± 18.92                      | < 0.05   |
| ALB                     | 37.38 ± 5.30                        | 9(0.36)                  | 37.87 ± 4.41                        | < 0.05   |
| 24h-UP                  | 1.69 ± 2.37                         | 39(1.58)                 | 1.36 ± 1.59                         | < 0.05   |
| SUA                     | 371.79 ± 104.35                     | 3(0.12)                  | 367.95 ± 101.93                     | 0.32     |
| SCr                     | 103.74 ± 97.38                      | 2 (0.08)                 | 94.86 ± 61.83                       | < 0.05   |
| Urea                    | 6.46 ± 3.62                         | 2 (0.08)                 | 6.12 ± 3.03                         | < 0.05   |
| M(1,%)                  | 2049 (99.51)                        | 410(16.61)               | 1011 (99.90)                        | 0.172    |
| E(1%)                   | 634 (30.79)                         | 410(16.61)               | 398 (39.33)                         | < 0.05   |
| S(1,%)                  | 1680 (81.59)                        | 410(16.61)               | 824 (81.42)                         | 0.909    |
| T(1/2,%)                | 631 (30.66)                         | 411(16.65)               | 269 (26.58)                         | < 0.05   |
| C(1/2,%)                | 1301 (63.18)                        | 410(16.61)               | 674 (66.60)                         | 0.101    |
| Podocyte fusion > 50%   | 276 (13.90)                         | 329(13.32)               | 130 (12.8)                          | 0.426    |
| IgA(3+/4+,%)            | 1680 (71.43)                        | 117(5.44)                | 826 (81.62)                         | < 0.05   |
| IgG(+,%)                | 663 (26.89)                         | 3(0.12)                  | 343 (33.89)                         | < 0.05   |
| IgM(2+/3+,%)            | 370 (15.00)                         | 3(0.12)                  | 194 (19.17)                         | < 0.05   |
| C3(3+/4+,%)             | 682 (27.67)                         | 4(0.16)                  | 351 (34.68)                         | < 0.05   |
| C4(+,%)                 | 151(6.30)                           | 73(2.96)                 | 47(4.6)                             | 0.059    |
| ARB                     | 1670 (67.64)                        | 0                        | 790 (78.06)                         | < 0.05   |
| ACEI                    | 372 (15.07)                         | 0                        | 167 (16.50)                         | 0.288    |
| SGLT2                   | 295 (11.95)                         | 0                        | 107 (10.57)                         | 0.249    |
| GC                      | 531 (21.51)                         | 0                        | 275 (27.17)                         | < 0.05   |

**Supplementary Table 2. Clinicopathological manifestations and laboratory data of the excluded IgAN patients at baseline**

|                         | young IgAN group |                 | elderly IgAN group | P      |
|-------------------------|------------------|-----------------|--------------------|--------|
|                         | Total (n = 2467) | (n = 2079)      | (n = 388)          |        |
| Age (years)             | 45.22 ± 13.18    | 41.23 ± 9.95    | 66.65 ± 5.43       | < 0.05 |
| Male (%)                | 1067 (43.27)     | 858 (41.29)     | 209 (53.87)        | < 0.05 |
| SBP                     | 128.13 ± 22.88   | 126.32 ± 22.30  | 137.47 ± 23.59     | < 0.05 |
| DBP                     | 80.09 ± 14.13    | 79.88 ± 14.41   | 81.20 ± 12.57      | 0.206  |
| Hb                      | 125.50 ± 19.20   | 126.05 ± 19.07  | 122.59 ± 19.62     | < 0.05 |
| ALB                     | 37.38 ± 5.30     | 37.77 ± 5.10    | 35.33 ± 5.83       | < 0.05 |
| SUA                     | 371.78 ± 104.36  | 367.90 ± 106.01 | 392.57 ± 92.47     | < 0.05 |
| SCr                     | 103.73 ± 97.42   | 99.39 ± 97.36   | 126.91 ± 94.52     | < 0.05 |
| Urea                    | 6.46 ± 3.62      | 6.13 ± 3.41     | 8.21 ± 4.17        | < 0.05 |
| 24h-UP                  | 1.69 ± 2.37      | 1.57 ± 2.21     | 2.35 ± 3.03        | < 0.05 |
| Hypertension (%)        | 303 (12.28)      | 238 (11.45)     | 65 (16.75)         | < 0.05 |
| Diabetes (%)            | 16 (0.65)        | 8 (0.38)        | 8 (2.06)           | < 0.05 |
| Alcohol consumption (%) | 83 (3.36)        | 50 (2.41)       | 33 (8.51)          | < 0.05 |
| Smoking (%)             | 184 (7.46)       | 135 (6.49)      | 49 (12.63)         | < 0.05 |
| Podocyte fusion > 50%   | 276 (13.90)      | 204 (12.15)     | 72 (23.53)         | < 0.05 |
| IgA(3+/4+,%)            | 1679 (71.45)     | 1473 (74.13)    | 206 (56.75)        | < 0.05 |
| IgG(+,%)                | 663 (26.91)      | 555 (26.73)     | 108 (27.84)        | 0.654  |
| IgM(2+/3+,%)            | 370 (15.02)      | 306 (14.74)     | 64 (16.49)         | 0.374  |
| C3(3+/4+,%)             | 682 (27.69)      | 608 (29.29)     | 74 (19.12)         | < 0.05 |
| M(1,%)                  | 2048 (99.51)     | 1756 (99.43)    | 292 (100.00)       | 0.404  |
| E(1%)                   | 634 (30.81)      | 559 (31.65)     | 75 (25.68)         | < 0.05 |
| S(1,%)                  | 1680 (81.63)     | 1470 (83.24)    | 210 (71.92)        | < 0.05 |
| T(1/2,%)                | 631 (30.68)      | 494 (27.99)     | 137 (46.92)        | < 0.05 |
| C(1/2,%)                | 688 (63.24)      | 592 (63.59)     | 96 (61.15)         | 0.557  |
| ARB                     | 1669 (67.65)     | 1417 (68.16)    | 252 (64.95)        | 0.215  |
| ACEI                    | 372 (15.08)      | 324 (15.58)     | 48 (12.37)         | 0.104  |
| SGLT2                   | 295 (11.96)      | 249 (11.98)     | 46 (11.86)         | 0.946  |
| GC                      | 531 (21.52)      | 458 (22.03)     | 73 (18.81)         | 0.157  |
